# Supplementary figures and images for: Autoimmune Pulmonary Alveolar Proteinosis Diagnosed after Exposure to a Fire Extinguisher Containing Silica Powder
Source: PubMed Central journal article supplement — Intern Med. 2019 Apr 17;58(14):2067–72. doi: 10.2169/internalmedicine.1557-18 (PMC6702020; doi:10.2169/internalmedicine.1557-18), 2019-04-17

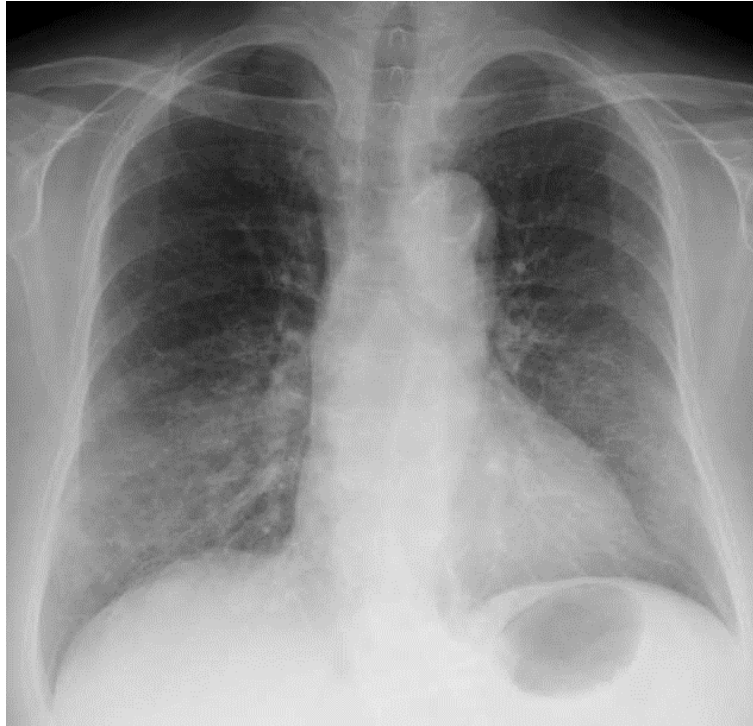

Supplementary Fig. S1

Supplement: 1349-7235-58-2067-s001.pdf [file 1349-7235-58-2067-s001.pdf]

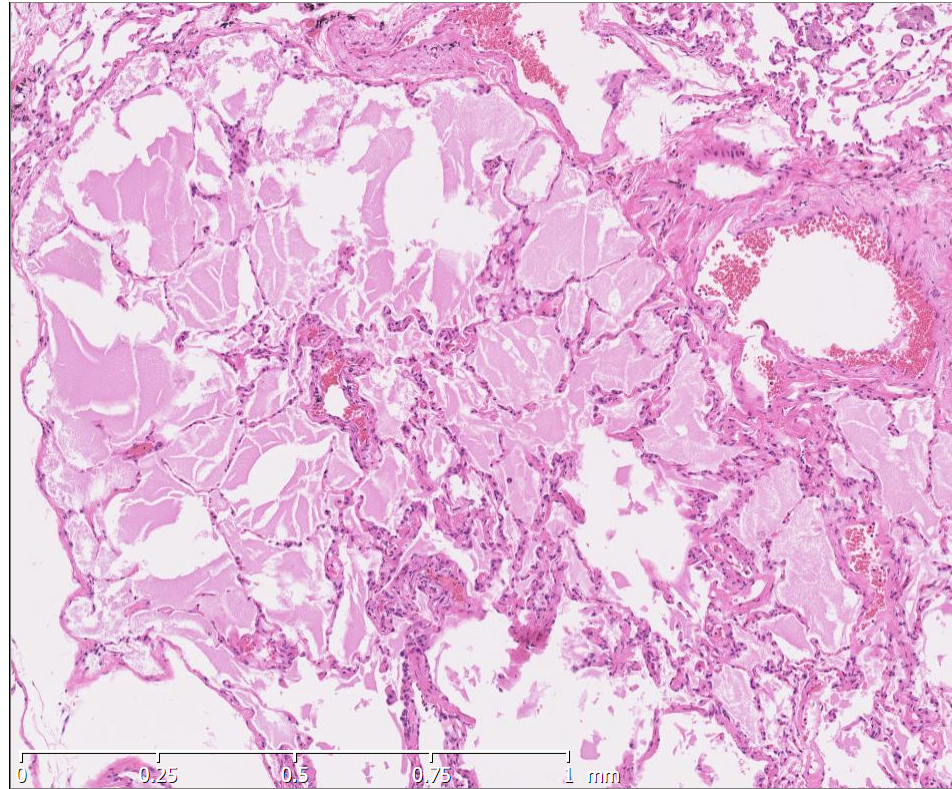

Supplementary Fig. S2A

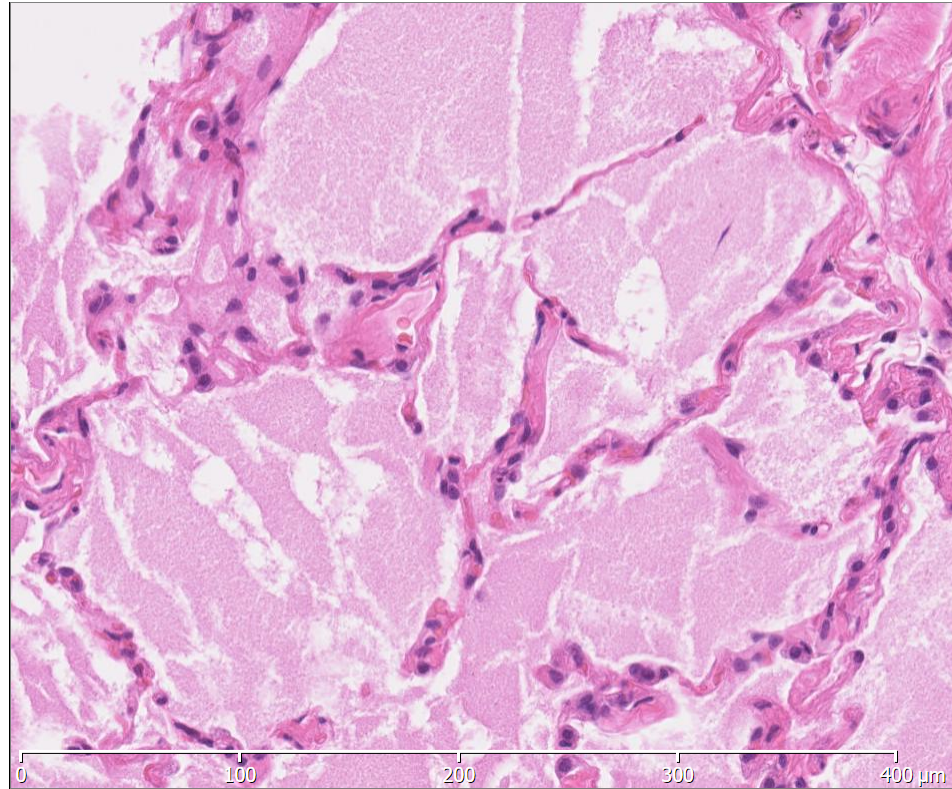

Supplementary Fig. S2B

Supplement: 1349-7235-58-2067-s002.pdf [file 1349-7235-58-2067-s002.pdf]
